# Supplementary material for: Differences in family planning outcomes between military and general populations in Kinshasa, Democratic Republic of the Congo: a cross-sectional analysis
Source: PubMed Central journal article supplement (PMC6318504; doi:10.1136/bmjopen-2018-022295), 2018-12-22
Supplement: bmjopen-2018-022295supp002.pdf [file bmjopen-2018-022295supp002.pdf]

| Household Questionnaire                                                               |                                                                                                                                                                                                                                                                                                                                          |                                                                                                                                                                 |       |         |                                            |
|---------------------------------------------------------------------------------------|------------------------------------------------------------------------------------------------------------------------------------------------------------------------------------------------------------------------------------------------------------------------------------------------------------------------------------------|-----------------------------------------------------------------------------------------------------------------------------------------------------------------|-------|---------|--------------------------------------------|
| NO                                                                                    | QUESTIONS AND FILTERS                                                                                                                                                                                                                                                                                                                    | CODING CATEGORIES                                                                                                                                               |       |         | SKIP                                       |
| <b>IDENTIFICATION</b>                                                                 |                                                                                                                                                                                                                                                                                                                                          |                                                                                                                                                                 |       |         |                                            |
| Please record the following identifying information prior to beginning the interview. |                                                                                                                                                                                                                                                                                                                                          |                                                                                                                                                                 |       |         |                                            |
| A                                                                                     | <b>Your name: Is this your name?</b><br>[ODK will display the name associated with the phone's serial number.]<br><i>Check the button next to the name if that is your name and select 'yes' here. Do not check the button if that is not your name and select 'no' here (long press to remove response next to the name if needed).</i> | Yes ..... 1<br>No ..... 0                                                                                                                                       |       |         |                                            |
|                                                                                       | <b>Enter your name below.</b><br><i>Please record your name</i>                                                                                                                                                                                                                                                                          | Interviewer's Name                                                                                                                                              |       |         |                                            |
| B                                                                                     | <b>Current date and time.</b><br>[ODK will display on screen]<br><b>Is this date and time correct?</b>                                                                                                                                                                                                                                   | Yes ..... 1<br>No ..... 0                                                                                                                                       |       |         | Skip to D if Yes                           |
| C                                                                                     | <b>Record the correct date and time</b>                                                                                                                                                                                                                                                                                                  | Date                                                                                                                                                            | Month | Day     | Year                                       |
|                                                                                       |                                                                                                                                                                                                                                                                                                                                          | Time                                                                                                                                                            | Hour  | Minutes | AM/PM                                      |
| D1                                                                                    | <b>Province</b>                                                                                                                                                                                                                                                                                                                          | Kinshasa ..... 1<br>Kongo Central ..... 2                                                                                                                       |       |         |                                            |
| D2                                                                                    | <b>City (Kinshasa) / District (Kongo Central)</b>                                                                                                                                                                                                                                                                                        | ODK will populate the city of Kinshasa and districts in Kongo Central based on the province selected.                                                           |       |         |                                            |
| D3                                                                                    | <b>Commune (Kinshasa) / Aire de santé (Kongo Central)</b>                                                                                                                                                                                                                                                                                | ODK will populate a list of appropriate communes in Kinshasa and <i>aire de santé</i> in Kongo Central based on the city or district selected.                  |       |         | If Kinshasa was selected in D1, skip to D6 |
| D4                                                                                    | <b>Quartier (Kinshasa) / Village (Kongo Central)</b>                                                                                                                                                                                                                                                                                     | ODK will populate a list of appropriate quarters in Kinshasa and villages in Kongo Central and chiefdoms based on the commune or <i>aire de santé</i> selected. |       |         |                                            |
| D5                                                                                    | <b>Enumeration area</b>                                                                                                                                                                                                                                                                                                                  | ODK will populate a list of appropriate enumeration areas based on the neighborhood in Kinshasa or the village in Kongo Central selected.                       |       |         | If Kongo Central selected in D1, skip to E |
| D6                                                                                    | <b>Please note the street or avenue number where the household is located</b>                                                                                                                                                                                                                                                            | <i>THE SUPERVISOR WILL GIVE YOU THE STREET OR AVENUE NAME.</i>                                                                                                  |       |         |                                            |
| E                                                                                     | <b>Structure number</b><br><i>Please record the structure number from the household listing form.</i>                                                                                                                                                                                                                                    | Number <input type="text"/>                                                                                                                                     |       |         |                                            |

Household Questionnaire

| NO                                                                                                                                                                                                                                                                                                                                                                                                                                                                                                                                                                                                                                                                                                                                                                                                                                                                                                                                                                                                                                                                                                                                                                                     | QUESTIONS AND FILTERS                                                                                                                                                    | CODING CATEGORIES                                                                                                                                                                                                                                                                                                  | SKIP             |
|----------------------------------------------------------------------------------------------------------------------------------------------------------------------------------------------------------------------------------------------------------------------------------------------------------------------------------------------------------------------------------------------------------------------------------------------------------------------------------------------------------------------------------------------------------------------------------------------------------------------------------------------------------------------------------------------------------------------------------------------------------------------------------------------------------------------------------------------------------------------------------------------------------------------------------------------------------------------------------------------------------------------------------------------------------------------------------------------------------------------------------------------------------------------------------------|--------------------------------------------------------------------------------------------------------------------------------------------------------------------------|--------------------------------------------------------------------------------------------------------------------------------------------------------------------------------------------------------------------------------------------------------------------------------------------------------------------|------------------|
| F                                                                                                                                                                                                                                                                                                                                                                                                                                                                                                                                                                                                                                                                                                                                                                                                                                                                                                                                                                                                                                                                                                                                                                                      | <b>Household number</b><br><i>Please record the household number from the household listing form.</i>                                                                    | Number <input style="width: 100px; height: 20px;" type="text"/>                                                                                                                                                                                                                                                    |                  |
|                                                                                                                                                                                                                                                                                                                                                                                                                                                                                                                                                                                                                                                                                                                                                                                                                                                                                                                                                                                                                                                                                                                                                                                        | <b>Check: Have you already sent a form for this structure and household?</b><br><i>Do not duplicate any form unless you are correcting a mistake in an earlier form.</i> | Yes ..... 1<br>No ..... 0                                                                                                                                                                                                                                                                                          | Skip to G if No  |
| <b>WARNING: Contact your supervisor before sending this form again.</b>                                                                                                                                                                                                                                                                                                                                                                                                                                                                                                                                                                                                                                                                                                                                                                                                                                                                                                                                                                                                                                                                                                                |                                                                                                                                                                          |                                                                                                                                                                                                                                                                                                                    |                  |
|                                                                                                                                                                                                                                                                                                                                                                                                                                                                                                                                                                                                                                                                                                                                                                                                                                                                                                                                                                                                                                                                                                                                                                                        | <b>CHECK: Why are you resending this form?</b><br><i>Choose al that apply.</i>                                                                                           | There are new household members on this form ..... 1<br>I am correcting a mistake made on a previous form ..... 2<br>The previous form disappeared from my phone without being sent ..... 3<br>I submitted the previous form and my supervisor told me that is was not received ..... 4<br>Other reason(s) ..... 5 |                  |
| G                                                                                                                                                                                                                                                                                                                                                                                                                                                                                                                                                                                                                                                                                                                                                                                                                                                                                                                                                                                                                                                                                                                                                                                      | <b>Is a member of the household and competent respondent present and available to be interviewed today?</b>                                                              | Yes ..... 1<br>No ..... 0                                                                                                                                                                                                                                                                                          | Skip to 31 if No |
| G2                                                                                                                                                                                                                                                                                                                                                                                                                                                                                                                                                                                                                                                                                                                                                                                                                                                                                                                                                                                                                                                                                                                                                                                     | <b>Did this household participate in a previous PMA2020 survey?</b>                                                                                                      | Yes ..... 1<br>No ..... 0<br>Do not know ..... -88<br>No response ..... -99                                                                                                                                                                                                                                        |                  |
| <b>INFORMED CONSENT</b>                                                                                                                                                                                                                                                                                                                                                                                                                                                                                                                                                                                                                                                                                                                                                                                                                                                                                                                                                                                                                                                                                                                                                                |                                                                                                                                                                          |                                                                                                                                                                                                                                                                                                                    |                  |
| <b>Find a competent member of the household. Read the greeting on the following screen.</b>                                                                                                                                                                                                                                                                                                                                                                                                                                                                                                                                                                                                                                                                                                                                                                                                                                                                                                                                                                                                                                                                                            |                                                                                                                                                                          |                                                                                                                                                                                                                                                                                                                    |                  |
| <p>Hello. My name is _____ and I am working for the School of Public Health of Kinshasa in collaboration with the Ministry of Health. We are conducting a survey in Kinshasa and Kongo Central about various health issues in the Democratic Republic of Congo. We would very much appreciate your participation in this survey. This information will help us inform the government to better plan health services. Whatever information you provide will be kept strictly confidential and will not be shown to anyone other than members of our survey team.</p> <p>Participation in this survey is voluntary, and if we should come to any question you don't want to answer, just let me know and I will go on to the next question; or you can stop the interview at any time. However, we hope that you will participate in this survey since your views are important.</p> <p>I am going to ask you questions about your family and other household members. We would then like to ask a different set of questions to female members of this household who are between the ages of 15 and 49 years.</p> <p>At this time, do you want to ask me anything about the survey?</p> |                                                                                                                                                                          |                                                                                                                                                                                                                                                                                                                    |                  |
| H                                                                                                                                                                                                                                                                                                                                                                                                                                                                                                                                                                                                                                                                                                                                                                                                                                                                                                                                                                                                                                                                                                                                                                                      | Provide a paper copy of the Consent Form to the respondent and explain it. Then, ask: <b>May I begin the interview now?</b>                                              | Yes ..... 1<br>No ..... 0                                                                                                                                                                                                                                                                                          | Skip to 32 if No |
|                                                                                                                                                                                                                                                                                                                                                                                                                                                                                                                                                                                                                                                                                                                                                                                                                                                                                                                                                                                                                                                                                                                                                                                        | <b>Respondent's signature</b><br><i>Please ask the respondent to sign or check the box in agreement of their participation.</i>                                          | Gather signature:<br><br>Check box: <input type="checkbox"/>                                                                                                                                                                                                                                                       |                  |

Household Questionnaire

| NO | QUESTIONS AND FILTERS                                                                                                                                  | CODING CATEGORIES                                 | SKIP |
|----|--------------------------------------------------------------------------------------------------------------------------------------------------------|---------------------------------------------------|------|
| I  | <p><b>Interviewer's name</b></p> <p><i>Please record your name as a witness to the consent process. You previously entered "[NAME FROM HQ B]."</i></p> | <input data-bbox="778 275 1214 367" type="text"/> |      |
| J  | <p><b>Respondent's first name.</b></p> <p><i>Please record the first name of the respondent.</i></p>                                                   | <input data-bbox="778 427 1214 495" type="text"/> |      |

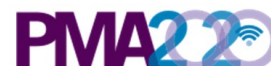

| <b>SECTION 1 – Household Roster</b>                                                                                                                       |                                                                                                                                                                                                                                                                           |                                |                                                     |                                                                                                                                                        |                                                                                                                                                                                                                                                    |                   |                                                                                                                                                                                                                                    |                                                                            |
|-----------------------------------------------------------------------------------------------------------------------------------------------------------|---------------------------------------------------------------------------------------------------------------------------------------------------------------------------------------------------------------------------------------------------------------------------|--------------------------------|-----------------------------------------------------|--------------------------------------------------------------------------------------------------------------------------------------------------------|----------------------------------------------------------------------------------------------------------------------------------------------------------------------------------------------------------------------------------------------------|-------------------|------------------------------------------------------------------------------------------------------------------------------------------------------------------------------------------------------------------------------------|----------------------------------------------------------------------------|
| <b>I am now going to ask you a series of questions about each usual member of the household or anyone who slept in the house last night.</b>              |                                                                                                                                                                                                                                                                           |                                |                                                     |                                                                                                                                                        |                                                                                                                                                                                                                                                    |                   |                                                                                                                                                                                                                                    |                                                                            |
| No                                                                                                                                                        | 1                                                                                                                                                                                                                                                                         | 2                              | 3                                                   | 4                                                                                                                                                      | 5                                                                                                                                                                                                                                                  | 6                 | 7                                                                                                                                                                                                                                  | 8                                                                          |
|                                                                                                                                                           | First name                                                                                                                                                                                                                                                                | Sex                            | Age (years)<br>If less than one year old, record 0. | Marital Status                                                                                                                                         | Relationship to head of household                                                                                                                                                                                                                  | Family ID         | Is this person a usual member of the household or has he/she slept in the house last night?                                                                                                                                        | Eligible female respondent                                                 |
|                                                                                                                                                           |                                                                                                                                                                                                                                                                           | Male ..... 1<br>Female ..... 2 |                                                     | Married ..... 1<br>Living with a partner .. 2<br>Divorced / separated . 3<br>Widow / widower ..... 4<br>Never Married ..... 5<br>No response ..... -99 | Head ..... 1<br>Wife/Husband ..... 2<br>Son/Daughter ..... 3<br>Son/Daughter-in-law . 4<br>Grandchild..... 5<br>Parent ..... 6<br>Parent in law ..... 7<br>Brother/Sister ..... 8<br>Other ..... 9<br>Don't know ..... -88<br>No response..... -99 |                   | Usual member of the household who slept in the house last night..... 1<br>Usual member of the household who did NOT sleep in the house last night..... 2<br>Visitor who slept in the house last night . 3<br>No response ..... -99 | Yes ..... 1<br>No..... 0<br><br>ODK will determine and display eligibility |
| 1                                                                                                                                                         |                                                                                                                                                                                                                                                                           |                                |                                                     |                                                                                                                                                        |                                                                                                                                                                                                                                                    |                   |                                                                                                                                                                                                                                    |                                                                            |
| 2                                                                                                                                                         |                                                                                                                                                                                                                                                                           |                                |                                                     |                                                                                                                                                        |                                                                                                                                                                                                                                                    |                   |                                                                                                                                                                                                                                    |                                                                            |
| 3                                                                                                                                                         |                                                                                                                                                                                                                                                                           |                                |                                                     |                                                                                                                                                        |                                                                                                                                                                                                                                                    |                   |                                                                                                                                                                                                                                    |                                                                            |
| 4                                                                                                                                                         |                                                                                                                                                                                                                                                                           |                                |                                                     |                                                                                                                                                        |                                                                                                                                                                                                                                                    |                   |                                                                                                                                                                                                                                    |                                                                            |
| 5                                                                                                                                                         |                                                                                                                                                                                                                                                                           |                                |                                                     |                                                                                                                                                        |                                                                                                                                                                                                                                                    |                   |                                                                                                                                                                                                                                    |                                                                            |
| After recording information for one household member, the following prompt is asked to activate a looping script to record information for another member |                                                                                                                                                                                                                                                                           |                                |                                                     |                                                                                                                                                        |                                                                                                                                                                                                                                                    |                   |                                                                                                                                                                                                                                    |                                                                            |
| 9                                                                                                                                                         | Are there any other usual members of your household or persons who slept in the house last night?                                                                                                                                                                         |                                |                                                     | Yes ..... 1<br>No ..... 0                                                                                                                              |                                                                                                                                                                                                                                                    |                   |                                                                                                                                                                                                                                    |                                                                            |
|                                                                                                                                                           | <b>READ THIS CHECK OUT LOUD: There are [NUMBER OF HOUSEHOLD MEMBERS ENTERED] household members who are named [NAMES OF ENTERED HOUSEHOLD MEMBERS]. Is this a complete list of the household members?</b><br><br><i>Remember to include all children in the household.</i> |                                |                                                     | Yes ..... 1<br>No ..... 0                                                                                                                              |                                                                                                                                                                                                                                                    | Skip to 10 if Yes |                                                                                                                                                                                                                                    |                                                                            |



| NO                                                                                                                | QUESTIONS AND FILTERS                                                                                                                                                                                                                                                         | CODING CATEGORIES                                                                                                                                                                                                                                                                                                                                                                                                                                                                                                                                                                                                                                                                                                                                                                                                                                   | SKIP                   |  |                           |  |       |  |       |  |           |  |             |  |                            |  |       |  |  |
|-------------------------------------------------------------------------------------------------------------------|-------------------------------------------------------------------------------------------------------------------------------------------------------------------------------------------------------------------------------------------------------------------------------|-----------------------------------------------------------------------------------------------------------------------------------------------------------------------------------------------------------------------------------------------------------------------------------------------------------------------------------------------------------------------------------------------------------------------------------------------------------------------------------------------------------------------------------------------------------------------------------------------------------------------------------------------------------------------------------------------------------------------------------------------------------------------------------------------------------------------------------------------------|------------------------|--|---------------------------|--|-------|--|-------|--|-----------|--|-------------|--|----------------------------|--|-------|--|--|
| 11b                                                                                                               | <p><b>How many of the following animals does this household own?</b></p> <p><b>Zero is a possible answer. Enter -88 for do not know. Enter -99 for no response.</b></p> <p><i>The household can keep the livestock anywhere but must own the livestock recorded here.</i></p> | <table style="width: 100%; border-collapse: collapse;"> <tr> <td style="width: 80%;">Cows or bulls</td> <td style="width: 20%; border: 1px solid black; height: 20px;"></td> </tr> <tr> <td>Horses, donkeys, or mules</td> <td style="border: 1px solid black; height: 20px;"></td> </tr> <tr> <td>Goats</td> <td style="border: 1px solid black; height: 20px;"></td> </tr> <tr> <td>Sheep</td> <td style="border: 1px solid black; height: 20px;"></td> </tr> <tr> <td>Hogs/pigs</td> <td style="border: 1px solid black; height: 20px;"></td> </tr> <tr> <td>Ducks/canes</td> <td style="border: 1px solid black; height: 20px;"></td> </tr> <tr> <td>Hens/ cocks/ other poultry</td> <td style="border: 1px solid black; height: 20px;"></td> </tr> <tr> <td>Other</td> <td style="border: 1px solid black; height: 20px;"></td> </tr> </table> | Cows or bulls          |  | Horses, donkeys, or mules |  | Goats |  | Sheep |  | Hogs/pigs |  | Ducks/canes |  | Hens/ cocks/ other poultry |  | Other |  |  |
| Cows or bulls                                                                                                     |                                                                                                                                                                                                                                                                               |                                                                                                                                                                                                                                                                                                                                                                                                                                                                                                                                                                                                                                                                                                                                                                                                                                                     |                        |  |                           |  |       |  |       |  |           |  |             |  |                            |  |       |  |  |
| Horses, donkeys, or mules                                                                                         |                                                                                                                                                                                                                                                                               |                                                                                                                                                                                                                                                                                                                                                                                                                                                                                                                                                                                                                                                                                                                                                                                                                                                     |                        |  |                           |  |       |  |       |  |           |  |             |  |                            |  |       |  |  |
| Goats                                                                                                             |                                                                                                                                                                                                                                                                               |                                                                                                                                                                                                                                                                                                                                                                                                                                                                                                                                                                                                                                                                                                                                                                                                                                                     |                        |  |                           |  |       |  |       |  |           |  |             |  |                            |  |       |  |  |
| Sheep                                                                                                             |                                                                                                                                                                                                                                                                               |                                                                                                                                                                                                                                                                                                                                                                                                                                                                                                                                                                                                                                                                                                                                                                                                                                                     |                        |  |                           |  |       |  |       |  |           |  |             |  |                            |  |       |  |  |
| Hogs/pigs                                                                                                         |                                                                                                                                                                                                                                                                               |                                                                                                                                                                                                                                                                                                                                                                                                                                                                                                                                                                                                                                                                                                                                                                                                                                                     |                        |  |                           |  |       |  |       |  |           |  |             |  |                            |  |       |  |  |
| Ducks/canes                                                                                                       |                                                                                                                                                                                                                                                                               |                                                                                                                                                                                                                                                                                                                                                                                                                                                                                                                                                                                                                                                                                                                                                                                                                                                     |                        |  |                           |  |       |  |       |  |           |  |             |  |                            |  |       |  |  |
| Hens/ cocks/ other poultry                                                                                        |                                                                                                                                                                                                                                                                               |                                                                                                                                                                                                                                                                                                                                                                                                                                                                                                                                                                                                                                                                                                                                                                                                                                                     |                        |  |                           |  |       |  |       |  |           |  |             |  |                            |  |       |  |  |
| Other                                                                                                             |                                                                                                                                                                                                                                                                               |                                                                                                                                                                                                                                                                                                                                                                                                                                                                                                                                                                                                                                                                                                                                                                                                                                                     |                        |  |                           |  |       |  |       |  |           |  |             |  |                            |  |       |  |  |
| 12a                                                                                                               | <p><b>Does this household keep any livestock, herds, other farm animals, or poultry ON THE HOMESTEAD, regardless of who owns these livestock?</b></p> <p><i>Homestead includes the structure and yard that is close to the structure.</i></p>                                 | <p>Yes ..... 1</p> <p>No ..... 0</p> <p>No response ..... -99</p>                                                                                                                                                                                                                                                                                                                                                                                                                                                                                                                                                                                                                                                                                                                                                                                   | Skip to 13 if No or NR |  |                           |  |       |  |       |  |           |  |             |  |                            |  |       |  |  |
| 12b                                                                                                               | <p><b>How many of the following animals does this household keep ON THE HOMESTEAD?</b></p> <p><b>Zero is a possible answer. Enter -88 for do not know. Enter -99 for no response.</b></p> <p><i>The household does not need to own the livestock recorded here.</i></p>       | <table style="width: 100%; border-collapse: collapse;"> <tr> <td style="width: 80%;">Cows or bulls</td> <td style="width: 20%; border: 1px solid black; height: 20px;"></td> </tr> <tr> <td>Horses, donkeys, or mules</td> <td style="border: 1px solid black; height: 20px;"></td> </tr> <tr> <td>Goats</td> <td style="border: 1px solid black; height: 20px;"></td> </tr> <tr> <td>Sheep</td> <td style="border: 1px solid black; height: 20px;"></td> </tr> <tr> <td>Hogs/pigs</td> <td style="border: 1px solid black; height: 20px;"></td> </tr> <tr> <td>Ducks/canes</td> <td style="border: 1px solid black; height: 20px;"></td> </tr> <tr> <td>Hens/ cocks/ other poultry</td> <td style="border: 1px solid black; height: 20px;"></td> </tr> <tr> <td>Other</td> <td style="border: 1px solid black; height: 20px;"></td> </tr> </table> | Cows or bulls          |  | Horses, donkeys, or mules |  | Goats |  | Sheep |  | Hogs/pigs |  | Ducks/canes |  | Hens/ cocks/ other poultry |  | Other |  |  |
| Cows or bulls                                                                                                     |                                                                                                                                                                                                                                                                               |                                                                                                                                                                                                                                                                                                                                                                                                                                                                                                                                                                                                                                                                                                                                                                                                                                                     |                        |  |                           |  |       |  |       |  |           |  |             |  |                            |  |       |  |  |
| Horses, donkeys, or mules                                                                                         |                                                                                                                                                                                                                                                                               |                                                                                                                                                                                                                                                                                                                                                                                                                                                                                                                                                                                                                                                                                                                                                                                                                                                     |                        |  |                           |  |       |  |       |  |           |  |             |  |                            |  |       |  |  |
| Goats                                                                                                             |                                                                                                                                                                                                                                                                               |                                                                                                                                                                                                                                                                                                                                                                                                                                                                                                                                                                                                                                                                                                                                                                                                                                                     |                        |  |                           |  |       |  |       |  |           |  |             |  |                            |  |       |  |  |
| Sheep                                                                                                             |                                                                                                                                                                                                                                                                               |                                                                                                                                                                                                                                                                                                                                                                                                                                                                                                                                                                                                                                                                                                                                                                                                                                                     |                        |  |                           |  |       |  |       |  |           |  |             |  |                            |  |       |  |  |
| Hogs/pigs                                                                                                         |                                                                                                                                                                                                                                                                               |                                                                                                                                                                                                                                                                                                                                                                                                                                                                                                                                                                                                                                                                                                                                                                                                                                                     |                        |  |                           |  |       |  |       |  |           |  |             |  |                            |  |       |  |  |
| Ducks/canes                                                                                                       |                                                                                                                                                                                                                                                                               |                                                                                                                                                                                                                                                                                                                                                                                                                                                                                                                                                                                                                                                                                                                                                                                                                                                     |                        |  |                           |  |       |  |       |  |           |  |             |  |                            |  |       |  |  |
| Hens/ cocks/ other poultry                                                                                        |                                                                                                                                                                                                                                                                               |                                                                                                                                                                                                                                                                                                                                                                                                                                                                                                                                                                                                                                                                                                                                                                                                                                                     |                        |  |                           |  |       |  |       |  |           |  |             |  |                            |  |       |  |  |
| Other                                                                                                             |                                                                                                                                                                                                                                                                               |                                                                                                                                                                                                                                                                                                                                                                                                                                                                                                                                                                                                                                                                                                                                                                                                                                                     |                        |  |                           |  |       |  |       |  |           |  |             |  |                            |  |       |  |  |
| <p><b>Section 3 – Household Observation</b></p> <p><b>Please observe the floors, roof and exterior walls.</b></p> |                                                                                                                                                                                                                                                                               |                                                                                                                                                                                                                                                                                                                                                                                                                                                                                                                                                                                                                                                                                                                                                                                                                                                     |                        |  |                           |  |       |  |       |  |           |  |             |  |                            |  |       |  |  |
| 13                                                                                                                | <p><b>Main material of the floor</b></p> <p><i>Observe.</i></p>                                                                                                                                                                                                               | <p>NATURAL MATERIAL</p> <p>EARTH / SAND ..... 11</p> <p>COW DUNG ..... 12</p> <p>RUDIMENTARY MATERIAL</p> <p>WOODEN BOARDS ..... 21</p> <p>PALM / BAMBOO ..... 22</p> <p>DEVELOPED MATERIAL</p> <p>PARQUET OR POLISHED WOOD .. 31</p> <p>TAPES VINYL / ASPHALT ..... 32</p> <p>TILES ..... 33</p> <p>CEMENT ..... 34</p> <p>CARPET ..... 35</p> <p>OTHER ..... 96</p> <p>NO RESPONSE ..... -99</p>                                                                                                                                                                                                                                                                                                                                                                                                                                                  |                        |  |                           |  |       |  |       |  |           |  |             |  |                            |  |       |  |  |

| NO                                                                                      | QUESTIONS AND FILTERS                                                                                                                                                                                                                                                                   | CODING CATEGORIES                                                                                                                                                                                                                                                                                                                                                                                                                                                                                                     | SKIP                                                                       |
|-----------------------------------------------------------------------------------------|-----------------------------------------------------------------------------------------------------------------------------------------------------------------------------------------------------------------------------------------------------------------------------------------|-----------------------------------------------------------------------------------------------------------------------------------------------------------------------------------------------------------------------------------------------------------------------------------------------------------------------------------------------------------------------------------------------------------------------------------------------------------------------------------------------------------------------|----------------------------------------------------------------------------|
| 14                                                                                      | <b>Main material of the roof</b><br><i>Observe.</i>                                                                                                                                                                                                                                     | NATURAL MATERIAL<br>NO ROOF ..... 11<br>THATCH/PALM ROOF ..... 12<br>EARTH MOTTES..... 13<br><br>RUDIMENTARY MATERIAL<br>MATS. .... 21<br>PALM / BAMBOO ..... 22<br>WOODEN BOARDS ..... 23<br>CARDBOARD ..... 24<br><br>DEVELOPED MATERIAL<br>SHEET METAL ..... 31<br>WOOD..... 32<br>ZINC / FIBER CEMENT ..... 33<br>TILE..... 34<br>CEMENT ..... 35<br>SHINGLES ..... 36<br>OTHER ..... 96<br>NO REPONSE ..... -99                                                                                                  |                                                                            |
| 15                                                                                      | <b>Main material of the exterior walls</b><br><i>Observe.</i>                                                                                                                                                                                                                           | NATURAL MATERIAL<br>NO WALL ..... 11<br>BAMBOO / CANE / PALM / TRUNK . 12<br>EARTH..... 13<br><br>RUDIMENTARY MATERIAL<br>BAMBOO WITH MUD ..... 21<br>STONES WITH MUD ..... 22<br>ADOBE NOT COVERED ..... 23<br>PLYWOOD..... 24<br>CARDBOARD ..... 25<br>RECOVERED WOOD..... 26<br><br>DEVELOPED MATERIAL<br>CEMENT ..... 31<br>STONES WITH LIME / CEMENT ... 321<br>BRICKS..... 332<br>CEMENT BLOCKS ..... 343<br>COVERED ADOBE..... 354<br>WOOD BOARD / SHINGLES ..... 365<br>OTHER..... 96<br>NO RESPONSE..... -99 |                                                                            |
| <b>Section 4 – Water, Sanitation and Hygiene</b>                                        |                                                                                                                                                                                                                                                                                         |                                                                                                                                                                                                                                                                                                                                                                                                                                                                                                                       |                                                                            |
| <b>Now I would like to ask you a few questions about water, sanitation and hygiene.</b> |                                                                                                                                                                                                                                                                                         |                                                                                                                                                                                                                                                                                                                                                                                                                                                                                                                       |                                                                            |
| 16                                                                                      | <b>Do you have a place to wash your hands, or do you have a movable container that is not kept in a fixed location, such as a bowl or kettle, that is commonly used for hand washing?</b><br><br><i>If the container is always in the same location, then count it as a fixed place</i> | Yes, fixed place ..... 1<br>Yes, movable container ..... 2<br>No..... 0<br>Don't know ..... -88<br>Refuse to answer..... -99                                                                                                                                                                                                                                                                                                                                                                                          | Skip to 19 if No<br><br>Go to 17a if 16 is 1<br><br>Skip to 17b if 16 is 2 |
| 17a                                                                                     | <b>Can you show it to me?</b>                                                                                                                                                                                                                                                           | Yes ..... 1<br>No..... 0                                                                                                                                                                                                                                                                                                                                                                                                                                                                                              | Skip to 19 if No                                                           |

Household Questionnaire

| NO  | QUESTIONS AND FILTERS                                                                                                                                                                                                                   | CODING CATEGORIES                                                      |                 | SKIP           |                                              |
|-----|-----------------------------------------------------------------------------------------------------------------------------------------------------------------------------------------------------------------------------------------|------------------------------------------------------------------------|-----------------|----------------|----------------------------------------------|
| 18a | <b>AT THE PLACE WHERE THE HOUSEHOLD WASHES THEIR HANDS, OBSERVE IF:</b>                                                                                                                                                                 | Soap is present.....                                                   | <u>Yes</u><br>1 | <u>No</u><br>0 |                                              |
|     |                                                                                                                                                                                                                                         | Water source is present: stored water .....                            | 1               | 0              |                                              |
|     |                                                                                                                                                                                                                                         | Water source is present: running water .....                           | 1               | 0              |                                              |
|     |                                                                                                                                                                                                                                         | Hand washing area is near a sanitation facility.....                   | 1               | 0              |                                              |
|     |                                                                                                                                                                                                                                         | None of the above.....                                                 | -77             |                |                                              |
| 17b | <b>Can you show me any soap, water, and movable container available in the household used for hand washing?</b>                                                                                                                         | Yes .....                                                              | 1               |                |                                              |
|     |                                                                                                                                                                                                                                         | No.....                                                                | 0               |                |                                              |
| 18b | <b>ANYWHERE WITHIN THE HOUSEHOLD, OBSERVE IF:</b>                                                                                                                                                                                       | Soap is present.....                                                   | <u>Yes</u><br>1 | <u>No</u><br>0 |                                              |
|     |                                                                                                                                                                                                                                         | Water source is present: stored water .....                            | 1               | 0              |                                              |
|     |                                                                                                                                                                                                                                         | Water source is present: running water .....                           | 1               | 0              |                                              |
|     |                                                                                                                                                                                                                                         | Hand washing container is observed .....                               | 1               | 0              |                                              |
|     |                                                                                                                                                                                                                                         | None of the above .....                                                | -77             |                |                                              |
| 19  | <b>Which of the following water sources does your household use on a regular basis for any part of the year for any purpose?</b><br><br><i>Read out all types and check all that are used. Scroll to the bottom to see all choices.</i> | Piped Water                                                            | <u>Yes</u>      | <u>No</u>      |                                              |
|     |                                                                                                                                                                                                                                         | Piped into dwelling/indoor .....                                       | 1               | 0              | If only one source is selected, skip to HQ22 |
|     |                                                                                                                                                                                                                                         | Pipe to yard/plot .....                                                | 1               | 0              |                                              |
|     |                                                                                                                                                                                                                                         | Public tap/standpipe .....                                             | 1               | 0              |                                              |
|     |                                                                                                                                                                                                                                         | Tube well or borehole .....                                            | 1               | 0              |                                              |
|     |                                                                                                                                                                                                                                         | Dug Well                                                               |                 |                |                                              |
|     |                                                                                                                                                                                                                                         | Protected Well .....                                                   | 1               | 0              |                                              |
|     |                                                                                                                                                                                                                                         | Unprotected Well .....                                                 | 1               | 0              |                                              |
|     |                                                                                                                                                                                                                                         | Water from Spring                                                      |                 |                |                                              |
|     |                                                                                                                                                                                                                                         | Protected Spring .....                                                 | 1               | 0              |                                              |
|     |                                                                                                                                                                                                                                         | Unprotected Spring .....                                               | 1               | 0              |                                              |
|     |                                                                                                                                                                                                                                         | Rainwater.....                                                         | 1               | 0              |                                              |
|     |                                                                                                                                                                                                                                         | Tanker Truck .....                                                     | 1               | 0              |                                              |
|     |                                                                                                                                                                                                                                         | Cart with Small Tank .....                                             | 1               | 0              |                                              |
|     |                                                                                                                                                                                                                                         | Surface water                                                          |                 |                |                                              |
|     |                                                                                                                                                                                                                                         | (River / Dam / Lake / Pond / Stream / Canal / Irrigation Channel)..... | 1               | 0              |                                              |
|     |                                                                                                                                                                                                                                         | Bottled Water .....                                                    | 1               | 0              |                                              |
|     |                                                                                                                                                                                                                                         | Sachet Water .....                                                     | 1               | 0              |                                              |
|     |                                                                                                                                                                                                                                         | No Response .....                                                      | -99             |                |                                              |
| 20  | <b>What is the main source of drinking water for members of your household?</b><br><br><b>Selections from HQ19: [ODK will list water sources selected for HQ19]</b><br><br><i>Read out HQ19 selections only.</i>                        | Piped Water                                                            |                 |                |                                              |
|     |                                                                                                                                                                                                                                         | Piped into dwelling/indoor .....                                       | 1               |                |                                              |
|     |                                                                                                                                                                                                                                         | Pipe to yard/plot .....                                                | 2               |                |                                              |
|     |                                                                                                                                                                                                                                         | Public tap/standpipe .....                                             | 3               |                |                                              |
|     |                                                                                                                                                                                                                                         | Tube well or borehole .....                                            | 4               |                |                                              |
|     |                                                                                                                                                                                                                                         | Dug Well                                                               |                 |                |                                              |
|     |                                                                                                                                                                                                                                         | Protected Well .....                                                   | 5               |                |                                              |
|     |                                                                                                                                                                                                                                         | Unprotected Well .....                                                 | 6               |                |                                              |
|     |                                                                                                                                                                                                                                         | Water from Spring                                                      |                 |                |                                              |
|     |                                                                                                                                                                                                                                         | Protected Spring .....                                                 | 7               |                |                                              |
|     |                                                                                                                                                                                                                                         | Unprotected Spring .....                                               | 8               |                |                                              |
|     |                                                                                                                                                                                                                                         | Rainwater.....                                                         | 9               |                |                                              |
|     |                                                                                                                                                                                                                                         | Tanker Truck .....                                                     | 10              |                |                                              |
|     |                                                                                                                                                                                                                                         | Cart with Small Tank .....                                             | 11              |                |                                              |
|     |                                                                                                                                                                                                                                         | Surface water                                                          |                 |                |                                              |
|     |                                                                                                                                                                                                                                         | (River / Dam / Lake / Pond / Stream / Canal / Irrigation Channel)..... | 12              |                |                                              |
|     |                                                                                                                                                                                                                                         | Bottled Water .....                                                    | 13              |                |                                              |
|     |                                                                                                                                                                                                                                         | Sachet Water .....                                                     | 14              |                |                                              |
|     |                                                                                                                                                                                                                                         | No Response .....                                                      | -99             |                |                                              |



Household Questionnaire

| NO                            | QUESTIONS AND FILTERS                                                                                                                                                                                                                                                                                                                        | CODING CATEGORIES                                                                                                                                                                                                                                                                                                                                                                                                                                                                                                                                                                                                                                                                                                                                                                                                                                                                                                                                                             | SKIP |     |    |                |   |   |               |   |   |                 |   |   |                               |   |   |                       |   |   |               |   |   |                  |     |  |  |
|-------------------------------|----------------------------------------------------------------------------------------------------------------------------------------------------------------------------------------------------------------------------------------------------------------------------------------------------------------------------------------------|-------------------------------------------------------------------------------------------------------------------------------------------------------------------------------------------------------------------------------------------------------------------------------------------------------------------------------------------------------------------------------------------------------------------------------------------------------------------------------------------------------------------------------------------------------------------------------------------------------------------------------------------------------------------------------------------------------------------------------------------------------------------------------------------------------------------------------------------------------------------------------------------------------------------------------------------------------------------------------|------|-----|----|----------------|---|---|---------------|---|---|-----------------|---|---|-------------------------------|---|---|-----------------------|---|---|---------------|---|---|------------------|-----|--|--|
| 21                            | <p><b>What is the main source of water used by your household for other purposes such as cooking and hand washing?</b></p> <p><b>Selections from HQ19: [ODK will list water sources selected for HQ19]</b></p> <p><i>Read out HQ19 selections only.</i></p>                                                                                  | <p>Piped Water<br/>                     Piped into dwelling/indoor ..... 1<br/>                     Pipe to yard/plot ..... 2<br/>                     Public tap/standpipe ..... 3<br/>                     Tube well or borehole ..... 4<br/>                     Dug Well<br/>                     Protected Well ..... 5<br/>                     Unprotected Well ..... 6<br/>                     Water from Spring<br/>                     Protected Spring ..... 7<br/>                     Unprotected Spring ..... 8<br/>                     Rainwater ..... 9<br/>                     Tanker Truck ..... 10<br/>                     Cart with Small Tank ..... 11<br/>                     Surface water<br/>                     (River / Dam / Lake / Pond / Stream / Canal / Irrigation Channel) ..... 12<br/>                     Bottled Water ..... 13<br/>                     Sachet Water ..... 14<br/>                     No Response ..... -99</p> |      |     |    |                |   |   |               |   |   |                 |   |   |                               |   |   |                       |   |   |               |   |   |                  |     |  |  |
|                               | <p><b>Questions HQ 22 to HQ 25 will repeat x times, once for each water source selected in HQ 19. These sources include:</b></p> <p><b>[ODK will display HQ19 selections.]</b></p>                                                                                                                                                           |                                                                                                                                                                                                                                                                                                                                                                                                                                                                                                                                                                                                                                                                                                                                                                                                                                                                                                                                                                               |      |     |    |                |   |   |               |   |   |                 |   |   |                               |   |   |                       |   |   |               |   |   |                  |     |  |  |
| 22                            | <p><b>You mentioned that you used [WATER SOURCE]. At any time of the year, does your household use water from this source for:</b></p>                                                                                                                                                                                                       | <table border="1"> <thead> <tr> <th></th> <th>Yes</th> <th>No</th> </tr> </thead> <tbody> <tr> <td>Drinking .....</td> <td>1</td> <td>0</td> </tr> <tr> <td>Cooking .....</td> <td>1</td> <td>0</td> </tr> <tr> <td>Livestock .....</td> <td>1</td> <td>0</td> </tr> <tr> <td>Gardening / agriculture .....</td> <td>1</td> <td>0</td> </tr> <tr> <td>Business venture.....</td> <td>1</td> <td>0</td> </tr> <tr> <td>Washing .....</td> <td>1</td> <td>0</td> </tr> <tr> <td>No response.....</td> <td>-99</td> <td></td> </tr> </tbody> </table>                                                                                                                                                                                                                                                                                                                                                                                                                            |      | Yes | No | Drinking ..... | 1 | 0 | Cooking ..... | 1 | 0 | Livestock ..... | 1 | 0 | Gardening / agriculture ..... | 1 | 0 | Business venture..... | 1 | 0 | Washing ..... | 1 | 0 | No response..... | -99 |  |  |
|                               | Yes                                                                                                                                                                                                                                                                                                                                          | No                                                                                                                                                                                                                                                                                                                                                                                                                                                                                                                                                                                                                                                                                                                                                                                                                                                                                                                                                                            |      |     |    |                |   |   |               |   |   |                 |   |   |                               |   |   |                       |   |   |               |   |   |                  |     |  |  |
| Drinking .....                | 1                                                                                                                                                                                                                                                                                                                                            | 0                                                                                                                                                                                                                                                                                                                                                                                                                                                                                                                                                                                                                                                                                                                                                                                                                                                                                                                                                                             |      |     |    |                |   |   |               |   |   |                 |   |   |                               |   |   |                       |   |   |               |   |   |                  |     |  |  |
| Cooking .....                 | 1                                                                                                                                                                                                                                                                                                                                            | 0                                                                                                                                                                                                                                                                                                                                                                                                                                                                                                                                                                                                                                                                                                                                                                                                                                                                                                                                                                             |      |     |    |                |   |   |               |   |   |                 |   |   |                               |   |   |                       |   |   |               |   |   |                  |     |  |  |
| Livestock .....               | 1                                                                                                                                                                                                                                                                                                                                            | 0                                                                                                                                                                                                                                                                                                                                                                                                                                                                                                                                                                                                                                                                                                                                                                                                                                                                                                                                                                             |      |     |    |                |   |   |               |   |   |                 |   |   |                               |   |   |                       |   |   |               |   |   |                  |     |  |  |
| Gardening / agriculture ..... | 1                                                                                                                                                                                                                                                                                                                                            | 0                                                                                                                                                                                                                                                                                                                                                                                                                                                                                                                                                                                                                                                                                                                                                                                                                                                                                                                                                                             |      |     |    |                |   |   |               |   |   |                 |   |   |                               |   |   |                       |   |   |               |   |   |                  |     |  |  |
| Business venture.....         | 1                                                                                                                                                                                                                                                                                                                                            | 0                                                                                                                                                                                                                                                                                                                                                                                                                                                                                                                                                                                                                                                                                                                                                                                                                                                                                                                                                                             |      |     |    |                |   |   |               |   |   |                 |   |   |                               |   |   |                       |   |   |               |   |   |                  |     |  |  |
| Washing .....                 | 1                                                                                                                                                                                                                                                                                                                                            | 0                                                                                                                                                                                                                                                                                                                                                                                                                                                                                                                                                                                                                                                                                                                                                                                                                                                                                                                                                                             |      |     |    |                |   |   |               |   |   |                 |   |   |                               |   |   |                       |   |   |               |   |   |                  |     |  |  |
| No response.....              | -99                                                                                                                                                                                                                                                                                                                                          |                                                                                                                                                                                                                                                                                                                                                                                                                                                                                                                                                                                                                                                                                                                                                                                                                                                                                                                                                                               |      |     |    |                |   |   |               |   |   |                 |   |   |                               |   |   |                       |   |   |               |   |   |                  |     |  |  |
| 23                            | <p><b>Is [WATER SOURCE] typically available:</b></p> <p><i>Read all choices out loud.</i></p>                                                                                                                                                                                                                                                | <p>All of the year ..... 1<br/>                     Some of the year ..... 2<br/>                     Small part of the year ..... 3<br/>                     No response..... -99</p>                                                                                                                                                                                                                                                                                                                                                                                                                                                                                                                                                                                                                                                                                                                                                                                        |      |     |    |                |   |   |               |   |   |                 |   |   |                               |   |   |                       |   |   |               |   |   |                  |     |  |  |
| 24                            | <p><b>At a time of year when you expect to have water from [WATER SOURCE], is it usually available?</b></p>                                                                                                                                                                                                                                  | <p>Yes, always ..... 1<br/>                     No, intermittent and predictable ..... 2<br/>                     No, intermittent and unpredictable ..... 3<br/>                     No response..... -99</p>                                                                                                                                                                                                                                                                                                                                                                                                                                                                                                                                                                                                                                                                                                                                                                |      |     |    |                |   |   |               |   |   |                 |   |   |                               |   |   |                       |   |   |               |   |   |                  |     |  |  |
| 25                            | <p><b>How long does it take to go to [WATER SOURCE], get water, and come back?</b></p> <p><i>Zero is a possible answer<br/>                     Enter -88 for do not know<br/>                     Enter -99 for no response</i></p> <p><i>Convert time into minutes.<br/>                     Answer includes waiting time in line.</i></p> | <p>Minutes: <input style="width: 100px; height: 20px;" type="text"/></p>                                                                                                                                                                                                                                                                                                                                                                                                                                                                                                                                                                                                                                                                                                                                                                                                                                                                                                      |      |     |    |                |   |   |               |   |   |                 |   |   |                               |   |   |                       |   |   |               |   |   |                  |     |  |  |
| 26                            | <p><b>Does your household have a garden?</b></p> <p><i>A garden is a place to grow vegetables.</i></p>                                                                                                                                                                                                                                       | <p>Yes ..... 1<br/>                     No..... 0<br/>                     No response..... -99</p>                                                                                                                                                                                                                                                                                                                                                                                                                                                                                                                                                                                                                                                                                                                                                                                                                                                                           |      |     |    |                |   |   |               |   |   |                 |   |   |                               |   |   |                       |   |   |               |   |   |                  |     |  |  |

## Household Questionnaire

| NO                                         | QUESTIONS AND FILTERS                                                                                                                                                                               | CODING CATEGORIES                                                                                                                                                                                                                                                                                                                                                                                                                                                                                                                                                                                                                                                                                                                                                                                                                                                                                                                                                                                                                                                                                                                                                                    | SKIP                                   |     |                                            |                                        |                                          |   |                              |    |                  |                   |                                       |   |                                      |   |                             |                 |                                         |   |                                      |   |                         |                                      |                                       |    |                                  |    |              |                                |                   |     |                    |   |   |                         |   |   |                                       |   |   |                                  |   |   |              |   |   |                   |     |  |  |
|--------------------------------------------|-----------------------------------------------------------------------------------------------------------------------------------------------------------------------------------------------------|--------------------------------------------------------------------------------------------------------------------------------------------------------------------------------------------------------------------------------------------------------------------------------------------------------------------------------------------------------------------------------------------------------------------------------------------------------------------------------------------------------------------------------------------------------------------------------------------------------------------------------------------------------------------------------------------------------------------------------------------------------------------------------------------------------------------------------------------------------------------------------------------------------------------------------------------------------------------------------------------------------------------------------------------------------------------------------------------------------------------------------------------------------------------------------------|----------------------------------------|-----|--------------------------------------------|----------------------------------------|------------------------------------------|---|------------------------------|----|------------------|-------------------|---------------------------------------|---|--------------------------------------|---|-----------------------------|-----------------|-----------------------------------------|---|--------------------------------------|---|-------------------------|--------------------------------------|---------------------------------------|----|----------------------------------|----|--------------|--------------------------------|-------------------|-----|--------------------|---|---|-------------------------|---|---|---------------------------------------|---|---|----------------------------------|---|---|--------------|---|---|-------------------|-----|--|--|
| 27                                         | <p><b>Do members of your household use any of the following toilet facilities?</b></p> <p><i>Read out all types and check all that are used. Scroll to the bottom to see all choices.</i></p>       | <table border="1"> <thead> <tr> <th></th> <th>Yes</th> <th>No</th> </tr> </thead> <tbody> <tr> <td>Flush/pour flush toilets connected to:</td> <td></td> <td></td> </tr> <tr> <td>  Piped sewer system .....</td> <td>1</td> <td>0</td> </tr> <tr> <td>  Septic tank .....</td> <td>1</td> <td>0</td> </tr> <tr> <td>  Pit Latrine .....</td> <td>1</td> <td>0</td> </tr> <tr> <td>  Elsewhere .....</td> <td>1</td> <td>0</td> </tr> <tr> <td>  Unknown / Not sure / Don't know.....</td> <td>1</td> <td>0</td> </tr> <tr> <td>Ventilated improved pit latrine.....</td> <td>1</td> <td>0</td> </tr> <tr> <td>Pit latrine with slab .....</td> <td>1</td> <td>0</td> </tr> <tr> <td>Pit latrine without slab .....</td> <td>1</td> <td>0</td> </tr> <tr> <td>Bucket toilet.....</td> <td>1</td> <td>0</td> </tr> <tr> <td>Composting toilet .....</td> <td>1</td> <td>0</td> </tr> <tr> <td>Hanging toilet /Hanging latrine .....</td> <td>1</td> <td>0</td> </tr> <tr> <td>No facility / bush / field .....</td> <td>1</td> <td>0</td> </tr> <tr> <td>Other: .....</td> <td>1</td> <td>0</td> </tr> <tr> <td>No Response .....</td> <td>-99</td> <td></td> </tr> </tbody> </table> |                                        | Yes | No                                         | Flush/pour flush toilets connected to: |                                          |   | Piped sewer system .....     | 1  | 0                | Septic tank ..... | 1                                     | 0 | Pit Latrine .....                    | 1 | 0                           | Elsewhere ..... | 1                                       | 0 | Unknown / Not sure / Don't know..... | 1 | 0                       | Ventilated improved pit latrine..... | 1                                     | 0  | Pit latrine with slab .....      | 1  | 0            | Pit latrine without slab ..... | 1                 | 0   | Bucket toilet..... | 1 | 0 | Composting toilet ..... | 1 | 0 | Hanging toilet /Hanging latrine ..... | 1 | 0 | No facility / bush / field ..... | 1 | 0 | Other: ..... | 1 | 0 | No Response ..... | -99 |  |  |
|                                            | Yes                                                                                                                                                                                                 | No                                                                                                                                                                                                                                                                                                                                                                                                                                                                                                                                                                                                                                                                                                                                                                                                                                                                                                                                                                                                                                                                                                                                                                                   |                                        |     |                                            |                                        |                                          |   |                              |    |                  |                   |                                       |   |                                      |   |                             |                 |                                         |   |                                      |   |                         |                                      |                                       |    |                                  |    |              |                                |                   |     |                    |   |   |                         |   |   |                                       |   |   |                                  |   |   |              |   |   |                   |     |  |  |
| Flush/pour flush toilets connected to:     |                                                                                                                                                                                                     |                                                                                                                                                                                                                                                                                                                                                                                                                                                                                                                                                                                                                                                                                                                                                                                                                                                                                                                                                                                                                                                                                                                                                                                      |                                        |     |                                            |                                        |                                          |   |                              |    |                  |                   |                                       |   |                                      |   |                             |                 |                                         |   |                                      |   |                         |                                      |                                       |    |                                  |    |              |                                |                   |     |                    |   |   |                         |   |   |                                       |   |   |                                  |   |   |              |   |   |                   |     |  |  |
| Piped sewer system .....                   | 1                                                                                                                                                                                                   | 0                                                                                                                                                                                                                                                                                                                                                                                                                                                                                                                                                                                                                                                                                                                                                                                                                                                                                                                                                                                                                                                                                                                                                                                    |                                        |     |                                            |                                        |                                          |   |                              |    |                  |                   |                                       |   |                                      |   |                             |                 |                                         |   |                                      |   |                         |                                      |                                       |    |                                  |    |              |                                |                   |     |                    |   |   |                         |   |   |                                       |   |   |                                  |   |   |              |   |   |                   |     |  |  |
| Septic tank .....                          | 1                                                                                                                                                                                                   | 0                                                                                                                                                                                                                                                                                                                                                                                                                                                                                                                                                                                                                                                                                                                                                                                                                                                                                                                                                                                                                                                                                                                                                                                    |                                        |     |                                            |                                        |                                          |   |                              |    |                  |                   |                                       |   |                                      |   |                             |                 |                                         |   |                                      |   |                         |                                      |                                       |    |                                  |    |              |                                |                   |     |                    |   |   |                         |   |   |                                       |   |   |                                  |   |   |              |   |   |                   |     |  |  |
| Pit Latrine .....                          | 1                                                                                                                                                                                                   | 0                                                                                                                                                                                                                                                                                                                                                                                                                                                                                                                                                                                                                                                                                                                                                                                                                                                                                                                                                                                                                                                                                                                                                                                    |                                        |     |                                            |                                        |                                          |   |                              |    |                  |                   |                                       |   |                                      |   |                             |                 |                                         |   |                                      |   |                         |                                      |                                       |    |                                  |    |              |                                |                   |     |                    |   |   |                         |   |   |                                       |   |   |                                  |   |   |              |   |   |                   |     |  |  |
| Elsewhere .....                            | 1                                                                                                                                                                                                   | 0                                                                                                                                                                                                                                                                                                                                                                                                                                                                                                                                                                                                                                                                                                                                                                                                                                                                                                                                                                                                                                                                                                                                                                                    |                                        |     |                                            |                                        |                                          |   |                              |    |                  |                   |                                       |   |                                      |   |                             |                 |                                         |   |                                      |   |                         |                                      |                                       |    |                                  |    |              |                                |                   |     |                    |   |   |                         |   |   |                                       |   |   |                                  |   |   |              |   |   |                   |     |  |  |
| Unknown / Not sure / Don't know.....       | 1                                                                                                                                                                                                   | 0                                                                                                                                                                                                                                                                                                                                                                                                                                                                                                                                                                                                                                                                                                                                                                                                                                                                                                                                                                                                                                                                                                                                                                                    |                                        |     |                                            |                                        |                                          |   |                              |    |                  |                   |                                       |   |                                      |   |                             |                 |                                         |   |                                      |   |                         |                                      |                                       |    |                                  |    |              |                                |                   |     |                    |   |   |                         |   |   |                                       |   |   |                                  |   |   |              |   |   |                   |     |  |  |
| Ventilated improved pit latrine.....       | 1                                                                                                                                                                                                   | 0                                                                                                                                                                                                                                                                                                                                                                                                                                                                                                                                                                                                                                                                                                                                                                                                                                                                                                                                                                                                                                                                                                                                                                                    |                                        |     |                                            |                                        |                                          |   |                              |    |                  |                   |                                       |   |                                      |   |                             |                 |                                         |   |                                      |   |                         |                                      |                                       |    |                                  |    |              |                                |                   |     |                    |   |   |                         |   |   |                                       |   |   |                                  |   |   |              |   |   |                   |     |  |  |
| Pit latrine with slab .....                | 1                                                                                                                                                                                                   | 0                                                                                                                                                                                                                                                                                                                                                                                                                                                                                                                                                                                                                                                                                                                                                                                                                                                                                                                                                                                                                                                                                                                                                                                    |                                        |     |                                            |                                        |                                          |   |                              |    |                  |                   |                                       |   |                                      |   |                             |                 |                                         |   |                                      |   |                         |                                      |                                       |    |                                  |    |              |                                |                   |     |                    |   |   |                         |   |   |                                       |   |   |                                  |   |   |              |   |   |                   |     |  |  |
| Pit latrine without slab .....             | 1                                                                                                                                                                                                   | 0                                                                                                                                                                                                                                                                                                                                                                                                                                                                                                                                                                                                                                                                                                                                                                                                                                                                                                                                                                                                                                                                                                                                                                                    |                                        |     |                                            |                                        |                                          |   |                              |    |                  |                   |                                       |   |                                      |   |                             |                 |                                         |   |                                      |   |                         |                                      |                                       |    |                                  |    |              |                                |                   |     |                    |   |   |                         |   |   |                                       |   |   |                                  |   |   |              |   |   |                   |     |  |  |
| Bucket toilet.....                         | 1                                                                                                                                                                                                   | 0                                                                                                                                                                                                                                                                                                                                                                                                                                                                                                                                                                                                                                                                                                                                                                                                                                                                                                                                                                                                                                                                                                                                                                                    |                                        |     |                                            |                                        |                                          |   |                              |    |                  |                   |                                       |   |                                      |   |                             |                 |                                         |   |                                      |   |                         |                                      |                                       |    |                                  |    |              |                                |                   |     |                    |   |   |                         |   |   |                                       |   |   |                                  |   |   |              |   |   |                   |     |  |  |
| Composting toilet .....                    | 1                                                                                                                                                                                                   | 0                                                                                                                                                                                                                                                                                                                                                                                                                                                                                                                                                                                                                                                                                                                                                                                                                                                                                                                                                                                                                                                                                                                                                                                    |                                        |     |                                            |                                        |                                          |   |                              |    |                  |                   |                                       |   |                                      |   |                             |                 |                                         |   |                                      |   |                         |                                      |                                       |    |                                  |    |              |                                |                   |     |                    |   |   |                         |   |   |                                       |   |   |                                  |   |   |              |   |   |                   |     |  |  |
| Hanging toilet /Hanging latrine .....      | 1                                                                                                                                                                                                   | 0                                                                                                                                                                                                                                                                                                                                                                                                                                                                                                                                                                                                                                                                                                                                                                                                                                                                                                                                                                                                                                                                                                                                                                                    |                                        |     |                                            |                                        |                                          |   |                              |    |                  |                   |                                       |   |                                      |   |                             |                 |                                         |   |                                      |   |                         |                                      |                                       |    |                                  |    |              |                                |                   |     |                    |   |   |                         |   |   |                                       |   |   |                                  |   |   |              |   |   |                   |     |  |  |
| No facility / bush / field .....           | 1                                                                                                                                                                                                   | 0                                                                                                                                                                                                                                                                                                                                                                                                                                                                                                                                                                                                                                                                                                                                                                                                                                                                                                                                                                                                                                                                                                                                                                                    |                                        |     |                                            |                                        |                                          |   |                              |    |                  |                   |                                       |   |                                      |   |                             |                 |                                         |   |                                      |   |                         |                                      |                                       |    |                                  |    |              |                                |                   |     |                    |   |   |                         |   |   |                                       |   |   |                                  |   |   |              |   |   |                   |     |  |  |
| Other: .....                               | 1                                                                                                                                                                                                   | 0                                                                                                                                                                                                                                                                                                                                                                                                                                                                                                                                                                                                                                                                                                                                                                                                                                                                                                                                                                                                                                                                                                                                                                                    |                                        |     |                                            |                                        |                                          |   |                              |    |                  |                   |                                       |   |                                      |   |                             |                 |                                         |   |                                      |   |                         |                                      |                                       |    |                                  |    |              |                                |                   |     |                    |   |   |                         |   |   |                                       |   |   |                                  |   |   |              |   |   |                   |     |  |  |
| No Response .....                          | -99                                                                                                                                                                                                 |                                                                                                                                                                                                                                                                                                                                                                                                                                                                                                                                                                                                                                                                                                                                                                                                                                                                                                                                                                                                                                                                                                                                                                                      |                                        |     |                                            |                                        |                                          |   |                              |    |                  |                   |                                       |   |                                      |   |                             |                 |                                         |   |                                      |   |                         |                                      |                                       |    |                                  |    |              |                                |                   |     |                    |   |   |                         |   |   |                                       |   |   |                                  |   |   |              |   |   |                   |     |  |  |
| 28                                         | <p><b>What is the main toilet facility used by members of your household?</b></p> <p><b>HQ27: [ODK will display HQ27 selections]</b></p> <p><i>The main facility must be selected in HQ 27.</i></p> | <table border="1"> <tbody> <tr> <td>Flush/pour flush toilets connected to:</td> <td></td> </tr> <tr> <td>  Piped sewer system .....</td> <td>1</td> </tr> <tr> <td>  Septic tank .....</td> <td>2</td> </tr> <tr> <td>  Pit Latrine .....</td> <td>13</td> </tr> <tr> <td>  Elsewhere .....</td> <td>3</td> </tr> <tr> <td>  Unknown / Not sure / Don't know .....</td> <td>4</td> </tr> <tr> <td>Ventilated improved pit latrine.....</td> <td>5</td> </tr> <tr> <td>Pit latrine with slab .....</td> <td>6</td> </tr> <tr> <td>Pit latrine without slab/open pit .....</td> <td>7</td> </tr> <tr> <td>Bucket toilet.....</td> <td>8</td> </tr> <tr> <td>Composting toilet .....</td> <td>9</td> </tr> <tr> <td>Hanging toilet /Hanging latrine .....</td> <td>10</td> </tr> <tr> <td>No facility / bush / field .....</td> <td>11</td> </tr> <tr> <td>Other: .....</td> <td>12</td> </tr> <tr> <td>No Response .....</td> <td>-99</td> </tr> </tbody> </table>                                                                                                                                                                                                                     | Flush/pour flush toilets connected to: |     | Piped sewer system .....                   | 1                                      | Septic tank .....                        | 2 | Pit Latrine .....            | 13 | Elsewhere .....  | 3                 | Unknown / Not sure / Don't know ..... | 4 | Ventilated improved pit latrine..... | 5 | Pit latrine with slab ..... | 6               | Pit latrine without slab/open pit ..... | 7 | Bucket toilet.....                   | 8 | Composting toilet ..... | 9                                    | Hanging toilet /Hanging latrine ..... | 10 | No facility / bush / field ..... | 11 | Other: ..... | 12                             | No Response ..... | -99 |                    |   |   |                         |   |   |                                       |   |   |                                  |   |   |              |   |   |                   |     |  |  |
| Flush/pour flush toilets connected to:     |                                                                                                                                                                                                     |                                                                                                                                                                                                                                                                                                                                                                                                                                                                                                                                                                                                                                                                                                                                                                                                                                                                                                                                                                                                                                                                                                                                                                                      |                                        |     |                                            |                                        |                                          |   |                              |    |                  |                   |                                       |   |                                      |   |                             |                 |                                         |   |                                      |   |                         |                                      |                                       |    |                                  |    |              |                                |                   |     |                    |   |   |                         |   |   |                                       |   |   |                                  |   |   |              |   |   |                   |     |  |  |
| Piped sewer system .....                   | 1                                                                                                                                                                                                   |                                                                                                                                                                                                                                                                                                                                                                                                                                                                                                                                                                                                                                                                                                                                                                                                                                                                                                                                                                                                                                                                                                                                                                                      |                                        |     |                                            |                                        |                                          |   |                              |    |                  |                   |                                       |   |                                      |   |                             |                 |                                         |   |                                      |   |                         |                                      |                                       |    |                                  |    |              |                                |                   |     |                    |   |   |                         |   |   |                                       |   |   |                                  |   |   |              |   |   |                   |     |  |  |
| Septic tank .....                          | 2                                                                                                                                                                                                   |                                                                                                                                                                                                                                                                                                                                                                                                                                                                                                                                                                                                                                                                                                                                                                                                                                                                                                                                                                                                                                                                                                                                                                                      |                                        |     |                                            |                                        |                                          |   |                              |    |                  |                   |                                       |   |                                      |   |                             |                 |                                         |   |                                      |   |                         |                                      |                                       |    |                                  |    |              |                                |                   |     |                    |   |   |                         |   |   |                                       |   |   |                                  |   |   |              |   |   |                   |     |  |  |
| Pit Latrine .....                          | 13                                                                                                                                                                                                  |                                                                                                                                                                                                                                                                                                                                                                                                                                                                                                                                                                                                                                                                                                                                                                                                                                                                                                                                                                                                                                                                                                                                                                                      |                                        |     |                                            |                                        |                                          |   |                              |    |                  |                   |                                       |   |                                      |   |                             |                 |                                         |   |                                      |   |                         |                                      |                                       |    |                                  |    |              |                                |                   |     |                    |   |   |                         |   |   |                                       |   |   |                                  |   |   |              |   |   |                   |     |  |  |
| Elsewhere .....                            | 3                                                                                                                                                                                                   |                                                                                                                                                                                                                                                                                                                                                                                                                                                                                                                                                                                                                                                                                                                                                                                                                                                                                                                                                                                                                                                                                                                                                                                      |                                        |     |                                            |                                        |                                          |   |                              |    |                  |                   |                                       |   |                                      |   |                             |                 |                                         |   |                                      |   |                         |                                      |                                       |    |                                  |    |              |                                |                   |     |                    |   |   |                         |   |   |                                       |   |   |                                  |   |   |              |   |   |                   |     |  |  |
| Unknown / Not sure / Don't know .....      | 4                                                                                                                                                                                                   |                                                                                                                                                                                                                                                                                                                                                                                                                                                                                                                                                                                                                                                                                                                                                                                                                                                                                                                                                                                                                                                                                                                                                                                      |                                        |     |                                            |                                        |                                          |   |                              |    |                  |                   |                                       |   |                                      |   |                             |                 |                                         |   |                                      |   |                         |                                      |                                       |    |                                  |    |              |                                |                   |     |                    |   |   |                         |   |   |                                       |   |   |                                  |   |   |              |   |   |                   |     |  |  |
| Ventilated improved pit latrine.....       | 5                                                                                                                                                                                                   |                                                                                                                                                                                                                                                                                                                                                                                                                                                                                                                                                                                                                                                                                                                                                                                                                                                                                                                                                                                                                                                                                                                                                                                      |                                        |     |                                            |                                        |                                          |   |                              |    |                  |                   |                                       |   |                                      |   |                             |                 |                                         |   |                                      |   |                         |                                      |                                       |    |                                  |    |              |                                |                   |     |                    |   |   |                         |   |   |                                       |   |   |                                  |   |   |              |   |   |                   |     |  |  |
| Pit latrine with slab .....                | 6                                                                                                                                                                                                   |                                                                                                                                                                                                                                                                                                                                                                                                                                                                                                                                                                                                                                                                                                                                                                                                                                                                                                                                                                                                                                                                                                                                                                                      |                                        |     |                                            |                                        |                                          |   |                              |    |                  |                   |                                       |   |                                      |   |                             |                 |                                         |   |                                      |   |                         |                                      |                                       |    |                                  |    |              |                                |                   |     |                    |   |   |                         |   |   |                                       |   |   |                                  |   |   |              |   |   |                   |     |  |  |
| Pit latrine without slab/open pit .....    | 7                                                                                                                                                                                                   |                                                                                                                                                                                                                                                                                                                                                                                                                                                                                                                                                                                                                                                                                                                                                                                                                                                                                                                                                                                                                                                                                                                                                                                      |                                        |     |                                            |                                        |                                          |   |                              |    |                  |                   |                                       |   |                                      |   |                             |                 |                                         |   |                                      |   |                         |                                      |                                       |    |                                  |    |              |                                |                   |     |                    |   |   |                         |   |   |                                       |   |   |                                  |   |   |              |   |   |                   |     |  |  |
| Bucket toilet.....                         | 8                                                                                                                                                                                                   |                                                                                                                                                                                                                                                                                                                                                                                                                                                                                                                                                                                                                                                                                                                                                                                                                                                                                                                                                                                                                                                                                                                                                                                      |                                        |     |                                            |                                        |                                          |   |                              |    |                  |                   |                                       |   |                                      |   |                             |                 |                                         |   |                                      |   |                         |                                      |                                       |    |                                  |    |              |                                |                   |     |                    |   |   |                         |   |   |                                       |   |   |                                  |   |   |              |   |   |                   |     |  |  |
| Composting toilet .....                    | 9                                                                                                                                                                                                   |                                                                                                                                                                                                                                                                                                                                                                                                                                                                                                                                                                                                                                                                                                                                                                                                                                                                                                                                                                                                                                                                                                                                                                                      |                                        |     |                                            |                                        |                                          |   |                              |    |                  |                   |                                       |   |                                      |   |                             |                 |                                         |   |                                      |   |                         |                                      |                                       |    |                                  |    |              |                                |                   |     |                    |   |   |                         |   |   |                                       |   |   |                                  |   |   |              |   |   |                   |     |  |  |
| Hanging toilet /Hanging latrine .....      | 10                                                                                                                                                                                                  |                                                                                                                                                                                                                                                                                                                                                                                                                                                                                                                                                                                                                                                                                                                                                                                                                                                                                                                                                                                                                                                                                                                                                                                      |                                        |     |                                            |                                        |                                          |   |                              |    |                  |                   |                                       |   |                                      |   |                             |                 |                                         |   |                                      |   |                         |                                      |                                       |    |                                  |    |              |                                |                   |     |                    |   |   |                         |   |   |                                       |   |   |                                  |   |   |              |   |   |                   |     |  |  |
| No facility / bush / field .....           | 11                                                                                                                                                                                                  |                                                                                                                                                                                                                                                                                                                                                                                                                                                                                                                                                                                                                                                                                                                                                                                                                                                                                                                                                                                                                                                                                                                                                                                      |                                        |     |                                            |                                        |                                          |   |                              |    |                  |                   |                                       |   |                                      |   |                             |                 |                                         |   |                                      |   |                         |                                      |                                       |    |                                  |    |              |                                |                   |     |                    |   |   |                         |   |   |                                       |   |   |                                  |   |   |              |   |   |                   |     |  |  |
| Other: .....                               | 12                                                                                                                                                                                                  |                                                                                                                                                                                                                                                                                                                                                                                                                                                                                                                                                                                                                                                                                                                                                                                                                                                                                                                                                                                                                                                                                                                                                                                      |                                        |     |                                            |                                        |                                          |   |                              |    |                  |                   |                                       |   |                                      |   |                             |                 |                                         |   |                                      |   |                         |                                      |                                       |    |                                  |    |              |                                |                   |     |                    |   |   |                         |   |   |                                       |   |   |                                  |   |   |              |   |   |                   |     |  |  |
| No Response .....                          | -99                                                                                                                                                                                                 |                                                                                                                                                                                                                                                                                                                                                                                                                                                                                                                                                                                                                                                                                                                                                                                                                                                                                                                                                                                                                                                                                                                                                                                      |                                        |     |                                            |                                        |                                          |   |                              |    |                  |                   |                                       |   |                                      |   |                             |                 |                                         |   |                                      |   |                         |                                      |                                       |    |                                  |    |              |                                |                   |     |                    |   |   |                         |   |   |                                       |   |   |                                  |   |   |              |   |   |                   |     |  |  |
|                                            | <p><b>Question HQ 29 will repeat x times, once for each sanitation facility selected in HQ27. These facilities include:</b></p> <p><b>HQ27: [ODK will display HQ27 selections]</b></p>              |                                                                                                                                                                                                                                                                                                                                                                                                                                                                                                                                                                                                                                                                                                                                                                                                                                                                                                                                                                                                                                                                                                                                                                                      |                                        |     |                                            |                                        |                                          |   |                              |    |                  |                   |                                       |   |                                      |   |                             |                 |                                         |   |                                      |   |                         |                                      |                                       |    |                                  |    |              |                                |                   |     |                    |   |   |                         |   |   |                                       |   |   |                                  |   |   |              |   |   |                   |     |  |  |
| 29                                         | <p><b>How often does your household typically use: [TOILET FACILITY TYPE]?</b></p> <p><i>Regular practices at the household only.</i></p>                                                           | <table border="1"> <tbody> <tr> <td>Always .....</td> <td>1</td> </tr> <tr> <td>Most of the time.....</td> <td>2</td> </tr> <tr> <td>Occasionally.....</td> <td>3</td> </tr> <tr> <td>Rarely.....</td> <td>4</td> </tr> <tr> <td>No response.....</td> <td>-99</td> </tr> </tbody> </table>                                                                                                                                                                                                                                                                                                                                                                                                                                                                                                                                                                                                                                                                                                                                                                                                                                                                                          | Always .....                           | 1   | Most of the time.....                      | 2                                      | Occasionally.....                        | 3 | Rarely.....                  | 4  | No response..... | -99               |                                       |   |                                      |   |                             |                 |                                         |   |                                      |   |                         |                                      |                                       |    |                                  |    |              |                                |                   |     |                    |   |   |                         |   |   |                                       |   |   |                                  |   |   |              |   |   |                   |     |  |  |
| Always .....                               | 1                                                                                                                                                                                                   |                                                                                                                                                                                                                                                                                                                                                                                                                                                                                                                                                                                                                                                                                                                                                                                                                                                                                                                                                                                                                                                                                                                                                                                      |                                        |     |                                            |                                        |                                          |   |                              |    |                  |                   |                                       |   |                                      |   |                             |                 |                                         |   |                                      |   |                         |                                      |                                       |    |                                  |    |              |                                |                   |     |                    |   |   |                         |   |   |                                       |   |   |                                  |   |   |              |   |   |                   |     |  |  |
| Most of the time.....                      | 2                                                                                                                                                                                                   |                                                                                                                                                                                                                                                                                                                                                                                                                                                                                                                                                                                                                                                                                                                                                                                                                                                                                                                                                                                                                                                                                                                                                                                      |                                        |     |                                            |                                        |                                          |   |                              |    |                  |                   |                                       |   |                                      |   |                             |                 |                                         |   |                                      |   |                         |                                      |                                       |    |                                  |    |              |                                |                   |     |                    |   |   |                         |   |   |                                       |   |   |                                  |   |   |              |   |   |                   |     |  |  |
| Occasionally.....                          | 3                                                                                                                                                                                                   |                                                                                                                                                                                                                                                                                                                                                                                                                                                                                                                                                                                                                                                                                                                                                                                                                                                                                                                                                                                                                                                                                                                                                                                      |                                        |     |                                            |                                        |                                          |   |                              |    |                  |                   |                                       |   |                                      |   |                             |                 |                                         |   |                                      |   |                         |                                      |                                       |    |                                  |    |              |                                |                   |     |                    |   |   |                         |   |   |                                       |   |   |                                  |   |   |              |   |   |                   |     |  |  |
| Rarely.....                                | 4                                                                                                                                                                                                   |                                                                                                                                                                                                                                                                                                                                                                                                                                                                                                                                                                                                                                                                                                                                                                                                                                                                                                                                                                                                                                                                                                                                                                                      |                                        |     |                                            |                                        |                                          |   |                              |    |                  |                   |                                       |   |                                      |   |                             |                 |                                         |   |                                      |   |                         |                                      |                                       |    |                                  |    |              |                                |                   |     |                    |   |   |                         |   |   |                                       |   |   |                                  |   |   |              |   |   |                   |     |  |  |
| No response.....                           | -99                                                                                                                                                                                                 |                                                                                                                                                                                                                                                                                                                                                                                                                                                                                                                                                                                                                                                                                                                                                                                                                                                                                                                                                                                                                                                                                                                                                                                      |                                        |     |                                            |                                        |                                          |   |                              |    |                  |                   |                                       |   |                                      |   |                             |                 |                                         |   |                                      |   |                         |                                      |                                       |    |                                  |    |              |                                |                   |     |                    |   |   |                         |   |   |                                       |   |   |                                  |   |   |              |   |   |                   |     |  |  |
| 29b                                        | <p><b>Do you share this toilet facility with other households or the public?</b></p>                                                                                                                | <table border="1"> <tbody> <tr> <td>Not shared.....</td> <td>1</td> </tr> <tr> <td>Shared with less than ten households .....</td> <td>2</td> </tr> <tr> <td>Shared with ten or more households .....</td> <td>3</td> </tr> <tr> <td>Shared with the public. ....</td> <td>4</td> </tr> <tr> <td>No response.....</td> <td>-99</td> </tr> </tbody> </table>                                                                                                                                                                                                                                                                                                                                                                                                                                                                                                                                                                                                                                                                                                                                                                                                                          | Not shared.....                        | 1   | Shared with less than ten households ..... | 2                                      | Shared with ten or more households ..... | 3 | Shared with the public. .... | 4  | No response..... | -99               | Skip to HQ30 if not 2                 |   |                                      |   |                             |                 |                                         |   |                                      |   |                         |                                      |                                       |    |                                  |    |              |                                |                   |     |                    |   |   |                         |   |   |                                       |   |   |                                  |   |   |              |   |   |                   |     |  |  |
| Not shared.....                            | 1                                                                                                                                                                                                   |                                                                                                                                                                                                                                                                                                                                                                                                                                                                                                                                                                                                                                                                                                                                                                                                                                                                                                                                                                                                                                                                                                                                                                                      |                                        |     |                                            |                                        |                                          |   |                              |    |                  |                   |                                       |   |                                      |   |                             |                 |                                         |   |                                      |   |                         |                                      |                                       |    |                                  |    |              |                                |                   |     |                    |   |   |                         |   |   |                                       |   |   |                                  |   |   |              |   |   |                   |     |  |  |
| Shared with less than ten households ..... | 2                                                                                                                                                                                                   |                                                                                                                                                                                                                                                                                                                                                                                                                                                                                                                                                                                                                                                                                                                                                                                                                                                                                                                                                                                                                                                                                                                                                                                      |                                        |     |                                            |                                        |                                          |   |                              |    |                  |                   |                                       |   |                                      |   |                             |                 |                                         |   |                                      |   |                         |                                      |                                       |    |                                  |    |              |                                |                   |     |                    |   |   |                         |   |   |                                       |   |   |                                  |   |   |              |   |   |                   |     |  |  |
| Shared with ten or more households .....   | 3                                                                                                                                                                                                   |                                                                                                                                                                                                                                                                                                                                                                                                                                                                                                                                                                                                                                                                                                                                                                                                                                                                                                                                                                                                                                                                                                                                                                                      |                                        |     |                                            |                                        |                                          |   |                              |    |                  |                   |                                       |   |                                      |   |                             |                 |                                         |   |                                      |   |                         |                                      |                                       |    |                                  |    |              |                                |                   |     |                    |   |   |                         |   |   |                                       |   |   |                                  |   |   |              |   |   |                   |     |  |  |
| Shared with the public. ....               | 4                                                                                                                                                                                                   |                                                                                                                                                                                                                                                                                                                                                                                                                                                                                                                                                                                                                                                                                                                                                                                                                                                                                                                                                                                                                                                                                                                                                                                      |                                        |     |                                            |                                        |                                          |   |                              |    |                  |                   |                                       |   |                                      |   |                             |                 |                                         |   |                                      |   |                         |                                      |                                       |    |                                  |    |              |                                |                   |     |                    |   |   |                         |   |   |                                       |   |   |                                  |   |   |              |   |   |                   |     |  |  |
| No response.....                           | -99                                                                                                                                                                                                 |                                                                                                                                                                                                                                                                                                                                                                                                                                                                                                                                                                                                                                                                                                                                                                                                                                                                                                                                                                                                                                                                                                                                                                                      |                                        |     |                                            |                                        |                                          |   |                              |    |                  |                   |                                       |   |                                      |   |                             |                 |                                         |   |                                      |   |                         |                                      |                                       |    |                                  |    |              |                                |                   |     |                    |   |   |                         |   |   |                                       |   |   |                                  |   |   |              |   |   |                   |     |  |  |

Household Questionnaire

| NO                                                                                                                                                         | QUESTIONS AND FILTERS                                                                                                                                                                                                                                                                                         | CODING CATEGORIES                                                                                                                                                                                                                                                                                                                                                | SKIP            |
|------------------------------------------------------------------------------------------------------------------------------------------------------------|---------------------------------------------------------------------------------------------------------------------------------------------------------------------------------------------------------------------------------------------------------------------------------------------------------------|------------------------------------------------------------------------------------------------------------------------------------------------------------------------------------------------------------------------------------------------------------------------------------------------------------------------------------------------------------------|-----------------|
| 29c                                                                                                                                                        | <p><b>Enter the number of households that share this facility (including your own).</b><br/> <b>[TOILET FACILITY TYPE]</b><br/> <i>Must be between 2 and 9.</i><br/> <i>If 10 or greater, swipe back to HQ29b and choose "shared with ten or more households."</i><br/> <i>Enter -99 for no response.</i></p> | <p>Number of Households: <input type="text"/></p>                                                                                                                                                                                                                                                                                                                |                 |
| 30                                                                                                                                                         | <p><b>How many people within your household regularly use the bush / field at home or at work?</b><br/> <b>There are x people in this household. Enter -88 for do not know, -99 for no response.</b></p>                                                                                                      | <p>Number of People: <input type="text"/></p>                                                                                                                                                                                                                                                                                                                    |                 |
| 31                                                                                                                                                         | <p><b>Ask permission to take a photo of the entrance of the house.</b><br/> <b>Did you get consent to take the photo?</b></p>                                                                                                                                                                                 | <p>Yes ..... 1<br/>                     No ..... 0</p>                                                                                                                                                                                                                                                                                                           | Skip L if No    |
| <p><b>Thank the respondent for her/his time.</b><br/> <i>The respondent is finished, but there is still more for you to complete outside the home.</i></p> |                                                                                                                                                                                                                                                                                                               |                                                                                                                                                                                                                                                                                                                                                                  |                 |
| <b>LOCATION AND QUESTIONNAIRE RESULT</b>                                                                                                                   |                                                                                                                                                                                                                                                                                                               |                                                                                                                                                                                                                                                                                                                                                                  |                 |
| K                                                                                                                                                          | <p><b>Location</b><br/> <b>Take a GPS point near the entrance to the household. Record location when the accuracy is smaller than 6m.</b></p>                                                                                                                                                                 | RECORD LOCATION                                                                                                                                                                                                                                                                                                                                                  |                 |
|                                                                                                                                                            | <b>CHECK 32: Permission to take photo?</b>                                                                                                                                                                                                                                                                    |                                                                                                                                                                                                                                                                                                                                                                  | Skip to M if No |
| L                                                                                                                                                          | <b>Ensure that no people are in the photo</b>                                                                                                                                                                                                                                                                 | TAKE PICTURE<br>CHOOSE IMAGE                                                                                                                                                                                                                                                                                                                                     |                 |
| M                                                                                                                                                          | <b>How many times have you visited this household?</b>                                                                                                                                                                                                                                                        | 1 <sup>st</sup> time ..... 1<br>2 <sup>nd</sup> time ..... 2<br>3 <sup>rd</sup> time ..... 3                                                                                                                                                                                                                                                                     |                 |
| N                                                                                                                                                          | <p><b>Questionnaire result</b><br/> <i>Record the result of the Household Questionnaire</i></p>                                                                                                                                                                                                               | Completed ..... 1<br>No household member at home or no competent respondent at home at time of visit ..... 2<br>Postponed ..... 3<br>Refused ..... 4<br>Partly completed ..... 5<br>Dwelling vacant or address not a dwelling ..... 6<br>Dwelling destroyed ..... 7<br>Dwelling not found ..... 8<br>Entire household absent for extended period of time ..... 9 |                 |
